# Supplementary material for: Internal conversion rate constant calculations considering Duschinsky, anharmonic and Herzberg–Teller effects
Source: Royal Society of Chemistry journal article supplement (doi:10.1039/d2cp05275j), 2023-01-01
Supplement: d2cp05275j1.pdf [file d2cp05275j1.pdf]

**Internal conversion rate constant calculations considering  
Duschinsky, Anharmonic and Herzberg-Teller effects**

R. R. Valiev,<sup>a</sup> B. S. Merzlikin,<sup>b</sup> R. T. Nasibullin,<sup>c</sup> A. Kurtzevitch,<sup>a</sup> V. N. Cherepanov,<sup>a</sup>  
R. R. Ramazanov,<sup>a</sup> D. Sundholm,<sup>a</sup> and T. Kurtén<sup>a</sup>

<sup>a</sup>*University of Helsinki, Department of Chemistry, P.O. Box 55*

*(A.I. Virtanens plats 1), FIN-00014 University of Helsinki, Finland*

<sup>b</sup>*Tomsk State University, 36 Lenin Avenue, Tomsk, Russia*

<sup>b</sup>*Tomsk State University, 36 Lenin Avenue, Tomsk, Russia*

Table S1. Calculated excitation energies of  $S_1$  and triplet states ( $\text{cm}^{-1}$ ) for poly[n]fluorenes with  $n=2..14$ .

| poly[n]fluorene | $S_1$    | $T_1$    | $T_2$    | $T_3$    | $T_4$    |
|-----------------|----------|----------|----------|----------|----------|
| 2               | 25514.32 | 16095.97 | 23047.82 | 29055.18 | 29482.66 |
| 3               | 22967.97 | 15557.99 | 19852.18 | 23836.65 | 27346.05 |
| 4               | 21927.49 | 15460.39 | 18760.89 | 21583.89 | 24223.81 |
| 5               | 21487.91 | 15538.63 | 18197.09 | 20476.47 | 21487.91 |
| 6               | 21311.27 | 15653.16 | 17969.64 | 19755.39 | 21500.01 |
| 7               | 21247.55 | 15745.11 | 17872.04 | 19408.57 | 20721.67 |
| 8               | 21241.91 | 15823.35 | 17847.04 | 19207.73 | 20296.6  |
| 9               | 21243.52 | 15868.52 | 17827.68 | 19102.87 | 19989.3  |

|    |          |          |          |          |          |
|----|----------|----------|----------|----------|----------|
| 10 | 21232.23 | 15883.04 | 17823.65 | 19041.58 | 19806.21 |
| 11 | 21235.45 | 15896.75 | 17825.26 | 19018.18 | 19687.64 |
| 12 | 21277.4  | 15952.4  | 17844.62 | 19002.05 | 19611.82 |
| 13 | 16947.71 | 12976.95 | 13297.16 | 13811.76 | 14487.66 |
| 14 | 21262.07 | 15943.53 | 17837.36 | 18991.57 | 19514.23 |

Table S1. Cartesian coordinates (Å) for ground and excited states of 4B.

S<sub>0</sub>

|   |                 |                 |                |
|---|-----------------|-----------------|----------------|
| O | 3.880119420072  | -0.014774011083 | 0.000000000000 |
| C | 3.043331737436  | -1.118261242991 | 0.000000000000 |
| C | 1.700237077131  | -0.722119989325 | 0.000000000000 |
| C | 0.709169915374  | -1.705668365562 | 0.000000000000 |
| C | 1.095084263331  | -3.051750039029 | 0.000000000000 |
| O | -0.014760085043 | -3.880106604034 | 0.000000000000 |
| C | -1.118258679974 | -3.043329756461 | 0.000000000000 |
| C | -0.722107910325 | -1.700225056129 | 0.000000000000 |
| C | -1.705680622524 | -0.709182207367 | 0.000000000000 |
| C | -3.051752278031 | -1.095087005316 | 0.000000000000 |
| O | -3.880119565067 | 0.014746177048  | 0.000000000000 |
| C | -3.043329883464 | 1.118228194019  | 0.000000000000 |
| C | -1.700233472164 | 0.722107469309  | 0.000000000000 |
| C | -0.709178274363 | 1.705648265558  | 0.000000000000 |
| C | -1.095094553341 | 3.051744290047  | 0.000000000000 |
| C | 1.118268877007  | 3.043323919424  | 0.000000000000 |
| C | 0.722116011288  | 1.700204908129  | 0.000000000000 |
| C | 1.705676865525  | 0.709169673381  | 0.000000000000 |
| C | 3.051750071044  | 1.095053961319  | 0.000000000000 |
| C | 3.451858044036  | 2.437578110551  | 0.000000000000 |
| C | 2.463767923466  | 3.433168333669  | 0.000000000000 |
| H | 2.737406319257  | 4.482188426677  | 0.000000000000 |

|   |                 |                 |                |
|---|-----------------|-----------------|----------------|
| C | -2.437584506558 | 3.451815135011  | 0.000000000000 |
| C | -3.433211118655 | 2.463761684466  | 0.000000000000 |
| H | -2.703232275829 | 4.502884734151  | 0.000000000000 |
| C | -3.451849413049 | -2.437602226587 | 0.000000000000 |
| C | -2.463758152472 | -3.433198890691 | 0.000000000000 |
| H | -4.502899853168 | -2.703239669811 | 0.000000000000 |
| C | 2.437574413560  | -3.451845609006 | 0.000000000000 |
| C | 3.433202261656  | -2.463785728481 | 0.000000000000 |
| H | 4.482203234644  | -2.737413578299 | 0.000000000000 |
| O | 0.014760009053  | 3.880093668032  | 0.000000000000 |
| H | 4.502912344185  | 2.703182851786  | 0.000000000000 |
| H | -4.482216215680 | 2.737356928287  | 0.000000000000 |
| H | -2.737372026296 | -4.482214194646 | 0.000000000000 |
| H | 2.703197679808  | -4.502910244145 | 0.000000000000 |

S<sub>1</sub>

|   |                 |                 |                |
|---|-----------------|-----------------|----------------|
| O | 3.895007463138  | -0.014793470095 | 0.000000000000 |
| C | 3.061303610716  | -1.121061844206 | 0.000000000000 |
| C | 1.702545489317  | -0.703562069970 | 0.000000000000 |
| C | 0.690581199014  | -1.707901739726 | 0.000000000000 |
| C | 1.097791922500  | -3.069761392371 | 0.000000000000 |
| O | -0.014812226095 | -3.894880459116 | 0.000000000000 |
| C | -1.121109690190 | -3.061325768743 | 0.000000000000 |
| C | -0.703553802951 | -1.702602321313 | 0.000000000000 |
| C | -1.707845586718 | -0.690591105000 | 0.000000000000 |
| C | -3.069739276361 | -1.097745344530 | 0.000000000000 |
| O | -3.895007347142 | 0.014831346063  | 0.000000000000 |
| C | -3.061347667738 | 1.121084575226  | 0.000000000000 |
| C | -1.702641392321 | 0.703523650961  | 0.000000000000 |
| C | -0.690577603995 | 1.707839170708  | 0.000000000000 |
| C | -1.097767052492 | 3.069740367365  | 0.000000000000 |
| C | 1.121084778219  | 3.061304501744  | 0.000000000000 |
| C | 0.703549240967  | 1.702539079340  | 0.000000000000 |
| C | 1.707941131734  | 0.690551915033  | 0.000000000000 |

|   |                 |                 |                |
|---|-----------------|-----------------|----------------|
| C | 3.069783795355  | 1.097767570504  | 0.000000000000 |
| C | 3.458120452486  | 2.421596679390  | 0.000000000000 |
| C | 2.447771304282  | 3.439530709152  | 0.000000000000 |
| H | 2.730674395805  | 4.485782041911  | 0.000000000000 |
| C | -2.421537480384 | 3.458048856498  | 0.000000000000 |
| C | -3.439601214136 | 2.447830448307  | 0.000000000000 |
| H | -2.696473742329 | 4.506421953430  | 0.000000000000 |
| C | -3.458141430501 | -2.421525999408 | 0.000000000000 |
| C | -2.447823115286 | -3.439498451142 | 0.000000000000 |
| H | -4.506496365436 | -2.696509816342 | 0.000000000000 |
| C | 2.421589442415  | -3.458016835454 | 0.000000000000 |
| C | 3.439622650154  | -2.447759691276 | 0.000000000000 |
| H | 4.485855376935  | -2.730710835797 | 0.000000000000 |
| O | 0.014812488090  | 3.894869722110  | 0.000000000000 |
| H | 4.506530238442  | 2.696270280292  | 0.000000000000 |
| H | -4.485891141908 | 2.730471790770  | 0.000000000000 |
| H | -2.730541751760 | -4.485788178938 | 0.000000000000 |
| H | 2.696340493328  | -4.506427024430 | 0.000000000000 |

Table S2. Cartesian coordinates (Å) for ground and excited states of H2P.

S<sub>0</sub>

|   |                 |                 |                |
|---|-----------------|-----------------|----------------|
| C | 2.896354329664  | -1.130550891511 | 0.000000000000 |
| N | 2.117541269044  | 0.000000627022  | 0.000000000000 |
| C | 2.896354623675  | 1.130551968493  | 0.000000000000 |
| C | 0.678273643717  | -4.259283209071 | 0.000000000000 |
| C | -0.678274931681 | -4.259281385050 | 0.000000000000 |
| C | -1.084926645498 | -2.856461652707 | 0.000000000000 |
| N | -0.000000752014 | -2.030326446103 | 0.000000000000 |
| C | 1.084925365524  | -2.856462665711 | 0.000000000000 |
| C | -0.678274857702 | 4.259279951086  | 0.000000000000 |
| C | 0.678273162695  | 4.259281000074  | 0.000000000000 |
| C | 1.084925227515  | 2.856460504710  | 0.000000000000 |
| N | -0.000001018984 | 2.030326751068  | 0.000000000000 |
| C | -1.084926518496 | 2.856460253721  | 0.000000000000 |

|                |                 |                 |                |
|----------------|-----------------|-----------------|----------------|
| C              | -4.261030718086 | -0.686225140702 | 0.000000000000 |
| C              | -4.261029736092 | 0.686226475710  | 0.000000000000 |
| C              | -2.896352570679 | 1.130551790478  | 0.000000000000 |
| N              | -2.117541486059 | 0.000000532987  | 0.000000000000 |
| C              | -2.896353192674 | -1.130550759482 | 0.000000000000 |
| C              | 4.261032419073  | 0.686227139669  | 0.000000000000 |
| C              | 4.261032644079  | -0.686225477682 | 0.000000000000 |
| C              | 2.422276986910  | -2.441740599900 | 0.000000000000 |
| C              | -2.422277027921 | 2.441740132901  | 0.000000000000 |
| C              | -2.422277574879 | -2.441739572873 | 0.000000000000 |
| C              | 2.422276868903  | 2.441740893911  | 0.000000000000 |
| H              | 1.101940356478  | 0.000000365979  | 0.000000000000 |
| H              | 1.352449786396  | -5.107614093702 | 0.000000000000 |
| H              | -1.352448474407 | -5.107614003689 | 0.000000000000 |
| H              | -1.352447263384 | 5.107613014709  | 0.000000000000 |
| H              | 1.352448254375  | 5.107612557659  | 0.000000000000 |
| H              | -5.117785995668 | -1.347611070383 | 0.000000000000 |
| H              | -5.117786317673 | 1.347610467386  | 0.000000000000 |
| H              | -1.101940915501 | -0.000001444019 | 0.000000000000 |
| H              | 5.117789090667  | 1.347611694389  | 0.000000000000 |
| H              | 5.117787756665  | -1.347612467411 | 0.000000000000 |
| H              | 3.180061554543  | -3.220358706543 | 0.000000000000 |
| H              | -3.180059484560 | 3.220358513552  | 0.000000000000 |
| H              | -3.180059637545 | -3.220359002564 | 0.000000000000 |
| H              | 3.180061085533  | 3.220358632564  | 0.000000000000 |
| S <sub>1</sub> |                 |                 |                |
| C              | 1.133128732494  | 2.897384997662  | 0.000000000000 |
| N              | -0.000000335022 | 2.115405741023  | 0.000000000000 |
| C              | -1.133129267493 | 2.897385750681  | 0.000000000000 |
| C              | 4.278097582062  | 0.681431677705  | 0.000000000000 |
| C              | 4.278096855079  | -0.681431870696 | 0.000000000000 |
| C              | 2.882699673669  | -1.089114672518 | 0.000000000000 |
| N              | 2.051636079057  | 0.000000135999  | 0.000000000000 |

|   |                 |                 |                |
|---|-----------------|-----------------|----------------|
| C | 2.882700388693  | 1.089114658495  | 0.000000000000 |
| C | -4.278096853068 | -0.681431943669 | 0.000000000000 |
| C | -4.278097036057 | 0.681431510697  | 0.000000000000 |
| C | -2.882699919683 | 1.089114956527  | 0.000000000000 |
| N | -2.051636435087 | 0.000000265012  | 0.000000000000 |
| C | -2.882699625672 | -1.089114417508 | 0.000000000000 |
| C | 0.687544455679  | -4.262026968077 | 0.000000000000 |
| C | -0.687544802713 | -4.262026349046 | 0.000000000000 |
| C | -1.133128953479 | -2.897385409679 | 0.000000000000 |
| N | 0.000000161981  | -2.115406118062 | 0.000000000000 |
| C | 1.133128946494  | -2.897386050672 | 0.000000000000 |
| C | -0.687545004700 | 4.262026595060  | 0.000000000000 |
| C | 0.687544381700  | 4.262026164045  | 0.000000000000 |
| C | 2.448962629910  | 2.428355172885  | 0.000000000000 |
| C | -2.448962136876 | -2.428354707897 | 0.000000000000 |
| C | 2.448962184872  | -2.428355402918 | 0.000000000000 |
| C | -2.448962850895 | 2.428355532884  | 0.000000000000 |
| H | -0.000001257008 | 1.101289468514  | 0.000000000000 |
| H | 5.127789854648  | 1.353535595403  | 0.000000000000 |
| H | 5.127788904669  | -1.353536259362 | 0.000000000000 |
| H | -5.127788771687 | -1.353536236396 | 0.000000000000 |
| H | -5.127789593658 | 1.353535171373  | 0.000000000000 |
| H | 1.348388131401  | -5.119123487673 | 0.000000000000 |
| H | -1.348388314391 | -5.119123053695 | 0.000000000000 |
| H | 0.000001466985  | -1.101289970492 | 0.000000000000 |
| H | -1.348387498399 | 5.119124068656  | 0.000000000000 |
| H | 1.348387890414  | 5.119122923676  | 0.000000000000 |
| H | 3.222070987540  | 3.191926147577  | 0.000000000000 |
| H | -3.222071135551 | -3.191924846541 | 0.000000000000 |
| H | 3.222071806547  | -3.191925015561 | 0.000000000000 |
| H | -3.222071324520 | 3.191926246533  | 0.000000000000 |

Table S3. Cartesian coordinates (Å) for ground and excited states of PM567.

S<sub>0</sub>

|   |                 |                 |                 |
|---|-----------------|-----------------|-----------------|
| C | -1.214925645100 | 0.889484143000  | 0.165885900500  |
| N | -1.239395599100 | -0.507131193500 | 0.152582182700  |
| B | -0.007791267900 | -1.447503538700 | 0.082166848600  |
| N | 1.225403805800  | -0.520742449400 | -0.079073805600 |
| C | 1.219993430100  | 0.875933334800  | -0.057635216200 |
| C | 0.010723685400  | 1.579864224300  | 0.102709579700  |
| C | 2.487605330400  | -0.954985231900 | -0.244104775400 |
| C | 3.357893242000  | 0.155810762100  | -0.364256956400 |
| C | 2.575053323800  | 1.308998765200  | -0.240477994500 |
| C | -2.576258345000 | 1.337557275400  | 0.229537414200  |
| C | -3.379701700900 | 0.193724023100  | 0.274317830200  |
| C | -2.515083855500 | -0.926931482400 | 0.222148187500  |
| C | 3.109803875600  | 2.709066262400  | -0.330384565900 |
| C | -3.104720288400 | 2.743149662100  | 0.198626972000  |
| C | -2.858338304900 | -2.380595125100 | 0.225040627800  |
| C | 2.811296846500  | -2.413021284900 | -0.272229158100 |
| C | 5.617924514500  | 0.112205947600  | 0.786334161400  |
| C | 4.848049085500  | 0.077187244400  | -0.546226082700 |
| C | -5.511267439400 | 0.050101387300  | -1.092701611200 |
| C | -4.881493935000 | 0.128103727600  | 0.309832929300  |
| C | 0.028591356200  | 3.084509385300  | 0.211402410500  |
| F | 0.099888432600  | -2.199299365200 | 1.253942997600  |
| F | -0.118518564800 | -2.292841576600 | -1.024025072900 |
| H | 2.545614208400  | 3.324949424700  | -1.037399036300 |
| H | 4.151071565100  | 2.698832389300  | -0.661419278100 |
| H | 3.090703423000  | 3.223081897600  | 0.638848251400  |
| H | -2.660270332700 | 3.331282172800  | -0.610086720600 |
| H | -4.185930690400 | 2.741149683500  | 0.041612084300  |
| H | -2.916986405300 | 3.282468705000  | 1.135747806600  |
| H | -2.303860270000 | -2.896037572800 | 1.014783097700  |
| H | -3.928803924500 | -2.534669549500 | 0.370630073200  |
| H | -2.552157662700 | -2.839169003700 | -0.720129440500 |
| H | 3.886130010900  | -2.579680910700 | -0.358650410400 |
| H | 2.443384650000  | -2.890939812300 | 0.640778452700  |

|   |                 |                 |                 |
|---|-----------------|-----------------|-----------------|
| H | 2.296760373200  | -2.899753721900 | -1.106068243600 |
| H | 6.699415728800  | 0.053511795300  | 0.622986639000  |
| H | 5.322890180100  | -0.725341426700 | 1.426840390500  |
| H | 5.404543715000  | 1.036195982600  | 1.333958679900  |
| H | 5.189853910600  | 0.901616664100  | -1.183330008600 |
| H | 5.104247909100  | -0.839308807000 | -1.089758910600 |
| H | -6.603892376000 | -0.001748961300 | -1.036545327900 |
| H | -5.154070141000 | -0.835125732800 | -1.628795100800 |
| H | -5.239903913800 | 0.927250100000  | -1.689506226100 |
| H | -5.195693396200 | -0.743376233700 | 0.896402164500  |
| H | -5.280637156800 | 0.999013767500  | 0.841770880400  |
| H | 0.948408257200  | 3.437253351100  | 0.672271919400  |
| H | -0.797577036000 | 3.447834891100  | 0.818118027800  |
| H | -0.050711693200 | 3.556113031100  | -0.776244892200 |

S<sub>1</sub>

|   |                 |                 |                 |
|---|-----------------|-----------------|-----------------|
| C | 1.228906559600  | 0.874243186300  | -0.203464439400 |
| N | 1.254763717100  | -0.539619287000 | -0.254805896300 |
| B | 0.003266188800  | -1.469637184300 | -0.163586027300 |
| N | -1.191573273900 | -0.552155088000 | 0.091414845200  |
| C | -1.217179138100 | 0.859993382000  | 0.045237855100  |
| C | -0.060674033800 | 1.592809238100  | -0.171809491500 |
| C | -2.450806148600 | -1.011883012000 | 0.306225519700  |
| C | -3.334698539200 | 0.084223298100  | 0.432456235100  |
| C | -2.587766789000 | 1.257212480900  | 0.268601773000  |
| C | 2.524091898200  | 1.302429428300  | -0.183613482900 |
| C | 3.388709219500  | 0.069825553600  | -0.276719012700 |
| C | 2.535408690900  | -1.016428957500 | -0.311751372500 |
| C | -3.132501546200 | 2.649310039900  | 0.378419721900  |
| C | 3.128921733500  | 2.662103395900  | -0.082240343800 |
| C | 2.833343648000  | -2.480054108900 | -0.380679800600 |
| C | -2.743149203200 | -2.473678816600 | 0.348933763500  |
| C | -5.626882404300 | 0.076795769800  | -0.648032599000 |
| C | -4.816311006000 | -0.014135247600 | 0.658456913000  |

|   |                 |                 |                 |
|---|-----------------|-----------------|-----------------|
| C | 5.441742151800  | 0.014529543300  | 1.186557834500  |
| C | 4.874800473000  | 0.062673559500  | -0.255779015100 |
| C | -0.065597697300 | 3.071080181200  | -0.437241189000 |
| F | -0.121449854100 | -2.180331710000 | -1.360455101100 |
| F | 0.190845975500  | -2.357429409400 | 0.901761303400  |
| H | -2.501112045700 | 3.290749357700  | 1.002067675000  |
| H | -4.130207633000 | 2.637038851700  | 0.826191691300  |
| H | -3.232296788500 | 3.143828380000  | -0.597624343400 |
| H | 2.414498312000  | 3.428301973900  | 0.208506952900  |
| H | 3.942683097300  | 2.661610850600  | 0.653301738400  |
| H | 3.580732099300  | 2.963328840400  | -1.037909472500 |
| H | 2.261808821700  | -2.945565218900 | -1.188904513200 |
| H | 3.899200350600  | -2.647859259600 | -0.552366172700 |
| H | 2.535198965600  | -2.981385573500 | 0.544651107300  |
| H | -3.805516559900 | -2.660840288700 | 0.513829411300  |
| H | -2.439851665800 | -2.946367461600 | -0.592759027300 |
| H | -2.160365974400 | -2.961893518300 | 1.137189170600  |
| H | -6.702480492800 | 0.003744772100  | -0.453971861200 |
| H | -5.346656374300 | -0.728687663100 | -1.334443663000 |
| H | -5.435311486900 | 1.026666555000  | -1.157831453900 |
| H | -5.141384358000 | 0.782439717000  | 1.339143425300  |
| H | -5.052765922200 | -0.954971424100 | 1.167825866700  |
| H | 6.536058231600  | 0.015077606200  | 1.163804205400  |
| H | 5.102995085600  | -0.889497920500 | 1.699719588300  |
| H | 5.108875327700  | 0.876668695200  | 1.772138548900  |
| H | 5.249516375400  | -0.805179336300 | -0.809196117200 |
| H | 5.262641968500  | 0.957163392700  | -0.758430233300 |
| H | -1.037584581800 | 3.413325414200  | -0.788093247100 |
| H | 0.660690640600  | 3.323146812200  | -1.217629684600 |
| H | 0.190423985300  | 3.674980210100  | 0.447102414900  |

Table S4. Cartesian coordinates (Å) for ground and excited states of bifluorene.

S<sub>0</sub>

|   |                |                |                |
|---|----------------|----------------|----------------|
| C | 0.000000000000 | 0.000000000000 | 1.483877284457 |
|---|----------------|----------------|----------------|

|   |                 |                 |                 |
|---|-----------------|-----------------|-----------------|
| C | 0.000000000000  | 0.000000000000  | 0.000000000000  |
| C | -0.958454756428 | 0.742716986792  | 2.203706168603  |
| C | 0.958048667395  | -0.739046484538 | 2.205115316710  |
| C | -1.211845522759 | 0.003488962230  | -0.718224619020 |
| C | 1.210919499721  | 0.000000000000  | -0.722609563319 |
| C | -0.949579108794 | 0.734357949188  | 3.591079601124  |
| C | 0.015890295144  | -0.011349753842 | 4.296199138165  |
| C | -1.881429889300 | 1.469005507400  | 4.555759715976  |
| C | -0.212216231360 | 0.168525084232  | 5.734317911376  |
| C | 0.973680442519  | -0.750511361368 | 3.599099270691  |
| C | -1.316231076322 | 1.028610564520  | 5.906469911806  |
| C | 0.460825230358  | -0.354552870707 | 6.840968663516  |
| C | -1.747806636603 | 1.366683204977  | 7.184277768392  |
| C | -3.346936585423 | 1.012189896292  | 4.380983030310  |
| C | -1.781190153040 | 3.000967908350  | 4.377817354103  |
| H | -1.685366310062 | 1.340509872071  | 1.660367206284  |
| H | 1.683063985902  | -1.336191396774 | 1.660378276249  |
| H | 1.719023581531  | -1.337984641891 | 4.128474811032  |
| C | 0.021754595560  | -0.011186030794 | 8.121717090287  |
| H | 1.311696596004  | -1.018148795766 | 6.712571404196  |
| C | -1.073253936739 | 0.842332445032  | 8.293802127729  |
| H | 0.534927033765  | -0.410153106686 | 8.992138429328  |
| H | -1.402761529619 | 1.100320113692  | 9.296251096335  |
| H | -2.597440184167 | 2.029554715011  | 7.328600404821  |
| H | -3.718831673361 | 1.278165227603  | 3.385708541222  |
| H | -3.993901696285 | 1.494829609252  | 5.121252052938  |
| H | -3.438310909026 | -0.070904401119 | 4.502274167112  |
| H | -0.749770946298 | 3.344218944225  | 4.497944024780  |
| H | -2.126890807075 | 3.298919379940  | 3.382273546974  |
| H | -2.401781448967 | 3.517597234771  | 5.117763226706  |
| C | 1.195148753549  | 0.004498887326  | -2.110154929868 |
| C | -0.026817252928 | 0.010199047754  | -2.811913681674 |
| C | 0.259023374742  | 0.021158765526  | -4.250790403873 |
| C | 1.657816534055  | 0.026842962952  | -4.427268852661 |

|   |                 |                 |                 |
|---|-----------------|-----------------|-----------------|
| C | 2.378597023307  | 0.019643135420  | -3.078778574017 |
| C | 2.202097507496  | 0.038342143802  | -5.706777617378 |
| C | -0.596902124232 | 0.026951295959  | -5.354704153860 |
| C | -1.234839234420 | 0.009752845710  | -2.111952052002 |
| C | 3.240300297719  | 1.288959420372  | -2.894033164624 |
| C | 3.256275528881  | -1.241749880926 | -2.916361979254 |
| C | 1.344253482385  | 0.043671814167  | -6.813603057543 |
| H | 3.279187696498  | 0.043349135163  | -5.854655723087 |
| C | -0.043550263158 | 0.037684354732  | -6.637116772751 |
| H | 1.759539245423  | 0.052322551787  | -7.817338312212 |
| H | -0.696318139430 | 0.041428070987  | -7.505468523649 |
| H | -1.675520467378 | 0.022540799649  | -5.222895041319 |
| H | -2.185319039299 | 0.004420890304  | -2.638645354108 |
| H | -2.149258666678 | -0.025909276898 | -0.171061114391 |
| H | 2.153104454980  | 0.025810202852  | -0.181531434173 |
| H | 4.044806517980  | 1.321526469707  | -3.636530327430 |
| H | 3.699777264987  | 1.303225069393  | -1.900007317622 |
| H | 2.636713572980  | 2.194216837923  | -3.004625136616 |
| H | 2.663410004900  | -2.152377960923 | -3.040679910224 |
| H | 4.059679331060  | -1.252697161762 | -3.660628279131 |
| H | 3.718324281334  | -1.267152625763 | -1.923637977342 |

S<sub>1</sub>

|   |                 |                 |                 |
|---|-----------------|-----------------|-----------------|
| C | 0.193355118900  | 0.543627479700  | 1.459500895000  |
| C | 0.172924546700  | 0.552506618400  | 0.023802771800  |
| C | -0.895654320400 | 1.076758171800  | 2.239634843600  |
| C | 1.305358272400  | -0.012583518700 | 2.191415532400  |
| C | -1.046155853000 | 0.798013354900  | -0.707641089500 |
| C | 1.360032315300  | 0.307129477500  | -0.756798650400 |
| C | -0.856046688100 | 1.042553350000  | 3.607799745200  |
| C | 0.254049278700  | 0.473078610900  | 4.307102288700  |
| C | -1.895557884600 | 1.561545310800  | 4.600484167300  |
| C | 0.016328615400  | 0.564137588300  | 5.716817680500  |
| C | 1.338872452700  | -0.056393875800 | 3.566840195500  |

|   |                 |                 |                 |
|---|-----------------|-----------------|-----------------|
| C | -1.243994374000 | 1.196972159500  | 5.931179628100  |
| C | 0.792532219400  | 0.145571141000  | 6.819508890900  |
| C | -1.717413896400 | 1.405759797300  | 7.214619314400  |
| C | -3.248975115500 | 0.842409547500  | 4.420124192400  |
| C | -2.083875792500 | 3.088168397300  | 4.469968122100  |
| H | -1.737794034200 | 1.545912705400  | 1.742826291600  |
| H | 2.126905064300  | -0.455963907300 | 1.640623778100  |
| H | 2.186690157000  | -0.503508516700 | 4.078352942200  |
| C | 0.302940126700  | 0.362188735400  | 8.102586208500  |
| H | 1.753668368100  | -0.336887118400 | 6.666278339000  |
| C | -0.940208913100 | 0.986501004800  | 8.308708483700  |
| H | 0.887978155800  | 0.045197586900  | 8.961575702100  |
| H | -1.300953497700 | 1.145939445400  | 9.320614432600  |
| H | -2.677776070700 | 1.888023483600  | 7.379132553900  |
| H | -3.669050230000 | 1.059545099300  | 3.432016818500  |
| H | -3.966646034500 | 1.175023456900  | 5.177619482000  |
| H | -3.129843750100 | -0.240708269300 | 4.511672968100  |
| H | -1.131190615300 | 3.610496855300  | 4.593704304700  |
| H | -2.490021424500 | 3.342242533400  | 3.484817462000  |
| H | -2.779906521300 | 3.455985476300  | 5.231442843400  |
| C | 1.308322233600  | 0.309049776000  | -2.125062920500 |
| C | 0.082572796200  | 0.544100573000  | -2.823856850600 |
| C | 0.326377349100  | 0.476835136000  | -4.233877260600 |
| C | 1.709626024100  | 0.203761219300  | -4.449055416000 |
| C | 2.448046489300  | 0.085896743400  | -3.118843177000 |
| C | 2.211968858900  | 0.083423716800  | -5.732810120900 |
| C | -0.542797681600 | 0.628655966300  | -5.336152330100 |
| C | -1.098973848800 | 0.789277949700  | -2.083039613300 |
| C | 3.531989495600  | 1.176542308800  | -2.984295360300 |
| C | 3.076862497600  | -1.312602098700 | -2.946656592800 |
| C | 1.341450060000  | 0.234229281400  | -6.826532271000 |
| H | 3.266361150600  | -0.124100398600 | -5.897721545400 |
| C | -0.023043731500 | 0.504601921400  | -6.619660062800 |
| H | 1.724209979000  | 0.142203121400  | -7.838718878100 |

|   |                 |                 |                 |
|---|-----------------|-----------------|-----------------|
| H | -0.679295539700 | 0.617359401500  | -7.478309683100 |
| H | -1.597655493900 | 0.837375282500  | -5.182202649000 |
| H | -2.042494304100 | 0.958877874900  | -2.594200449800 |
| H | -1.967137730200 | 0.949560639700  | -0.156780200400 |
| H | 2.312351272800  | 0.159028522300  | -0.259492602900 |
| H | 4.306972925600  | 1.044543337000  | -3.746988462100 |
| H | 4.009071542700  | 1.124784333800  | -1.999617697600 |
| H | 3.098483616500  | 2.173338766000  | -3.103781332200 |
| H | 2.318577090500  | -2.094900879000 | -3.039894496300 |
| H | 3.845431007000  | -1.485706108000 | -3.707576026000 |
| H | 3.545420701300  | -1.403809477600 | -1.960698863300 |

Table S5. Cartesian coordinates (Å) for ground and excited states of trifluorene.

S<sub>0</sub>

|   |                 |                 |                 |
|---|-----------------|-----------------|-----------------|
| C | 1.175677298600  | -0.490998201500 | 0.163456125300  |
| C | 0.730696476700  | 0.845466690600  | 0.137387277900  |
| C | -0.729470164300 | 0.851964920500  | 0.242838017600  |
| C | -1.176872044600 | -0.480404187400 | 0.340549892800  |
| C | -0.001988615700 | -1.453486411100 | 0.290128492200  |
| C | 2.526521437300  | -0.788182348000 | 0.085802728600  |
| C | 3.472669129500  | 0.250884332000  | -0.025960810100 |
| C | 3.011452752500  | 1.581824960600  | -0.053310895500 |
| C | 1.653839253500  | 1.886696174300  | 0.028860262200  |
| C | -1.650106641600 | 1.901013431400  | 0.259813710900  |
| C | -3.007773268200 | 1.608255638300  | 0.378085327700  |
| C | -3.470555813100 | 0.281500308500  | 0.479164755400  |
| C | -2.527546225200 | -0.765946741800 | 0.455686627600  |
| C | 0.089028613300  | -2.290787554700 | 1.583055562900  |
| C | -0.095619916300 | -2.381612276800 | -0.939739732700 |
| C | 9.571380792000  | 0.357398848700  | 0.593045213500  |
| C | 9.120580573900  | -0.730723039300 | -0.180755999900 |
| C | 7.659708611800  | -0.658671504000 | -0.274537794500 |
| C | 7.219349356600  | 0.471755495400  | 0.440373027000  |
| C | 8.399613358200  | 1.219653715400  | 1.054347206900  |

|   |                  |                 |                 |
|---|------------------|-----------------|-----------------|
| C | 10.927066653700  | 0.527865709500  | 0.842963963600  |
| C | 11.837422139800  | -0.397043610700 | 0.317013149400  |
| C | 11.389106749500  | -1.478204068100 | -0.449912014400 |
| C | 10.027133761100  | -1.653232026700 | -0.705787956200 |
| C | 6.734585964700   | -1.485569112700 | -0.912831501100 |
| C | 5.378412943600   | -1.175275766700 | -0.828797802300 |
| C | 4.920839865000   | -0.052287647800 | -0.111442400700 |
| C | 5.869481826500   | 0.772883101600  | 0.525953127900  |
| C | 8.504335299700   | 2.653366657000  | 0.492541296700  |
| C | 8.301259599900   | 1.258276143700  | 2.593812612500  |
| C | -7.222277818900  | 0.463974962300  | 0.040809828600  |
| C | -7.656345440200  | -0.566706658400 | 0.896591946900  |
| C | -9.120061640600  | -0.627124749300 | 0.849758558600  |
| C | -9.578671597900  | 0.363640853000  | -0.041222972200 |
| C | -8.409104295100  | 1.139472410500  | -0.640662123100 |
| C | -5.872539924800  | 0.743572094000  | -0.101809694100 |
| C | -4.918005118100  | -0.007105803200 | 0.613544080800  |
| C | -5.367981150300  | -1.037323331200 | 1.462656866100  |
| C | -6.724462604400  | -1.322512939100 | 1.608954725900  |
| C | -10.023336553500 | -1.458449836600 | 1.513935922900  |
| C | -11.390120959400 | -1.289410534400 | 1.280677216300  |
| C | -11.845956806900 | -0.306097809000 | 0.395750557200  |
| C | -10.938796816200 | 0.526309188600  | -0.271288212500 |
| C | -8.349408548500  | 0.962132339000  | -2.172851808700 |
| C | -8.483311542700  | 2.638122542300  | -0.281701306200 |
| H | 2.865504972700   | -1.819092198800 | 0.137307309000  |
| H | 3.731212097200   | 2.386265137000  | -0.168708900900 |
| H | 1.323425179700   | 2.921253600500  | -0.001865255300 |
| H | -1.317780744400  | 2.933314018300  | 0.195137776300  |
| H | -3.726283998500  | 2.420984735800  | 0.423685514000  |
| H | -2.868867693700  | -1.796254906700 | 0.503678209500  |
| H | 0.972851875300   | -2.936642315300 | 1.561947773600  |
| H | -0.794901147200  | -2.928062264900 | 1.691190148200  |
| H | 0.156815771400   | -1.644889445000 | 2.462787218000  |

|   |                  |                 |                 |
|---|------------------|-----------------|-----------------|
| H | -0.158062225400  | -1.799635362900 | -1.863443513300 |
| H | 0.785369751900   | -3.029332599700 | -0.999946575700 |
| H | -0.983470905400  | -3.018956237900 | -0.874785092900 |
| H | 11.279791986500  | 1.365663755900  | 1.438886302300  |
| H | 12.899879569700  | -0.274754723600 | 0.506087857900  |
| H | 12.107256943000  | -2.188278581200 | -0.849539642200 |
| H | 9.681413679000   | -2.493334084500 | -1.301690152800 |
| H | 7.061778367900   | -2.354963139000 | -1.476195058900 |
| H | 4.656752746800   | -1.797553011600 | -1.348930936600 |
| H | 5.534448973400   | 1.627850384800  | 1.106545173000  |
| H | 9.393905429100   | 3.156565065300  | 0.885672319200  |
| H | 7.626631227600   | 3.243104501000  | 0.777099112600  |
| H | 8.570901200700   | 2.640918184700  | -0.598873577200 |
| H | 8.227460061200   | 0.248032946800  | 3.005654443500  |
| H | 9.184923309800   | 1.741603158100  | 3.023327007000  |
| H | 7.417945462400   | 1.823558297200  | 2.909123783400  |
| H | -5.541881098600  | 1.522581312200  | -0.783009014100 |
| H | -4.639581157500  | -1.602010190700 | 2.036717445600  |
| H | -7.046554955900  | -2.115710378500 | 2.277821366400  |
| H | -9.670852275100  | -2.222398269400 | 2.201141764500  |
| H | -12.106494783200 | -1.926496607700 | 1.791159624500  |
| H | -12.912115150300 | -0.187475416400 | 0.226205093600  |
| H | -11.297790687600 | 1.288568696900  | -0.957854179800 |
| H | -7.469668663900  | 1.467050561900  | -2.585399831700 |
| H | -9.240125673600  | 1.390962485500  | -2.643769651700 |
| H | -8.295289598100  | -0.096700965400 | -2.440661210700 |
| H | -8.526109911300  | 2.777824917400  | 0.802010278800  |
| H | -9.374327838800  | 3.096199561100  | -0.723474810800 |
| H | -7.604520432300  | 3.168422764300  | -0.663411008400 |

S<sub>1</sub>

|   |                 |                 |                 |
|---|-----------------|-----------------|-----------------|
| C | 1.179792422433  | -0.671733417634 | -0.048333898487 |
| C | 0.710641654460  | 0.680503255272  | -0.027743590985 |
| C | -0.710624213466 | 0.680505402303  | 0.027788437010  |

|   |                 |                 |                 |
|---|-----------------|-----------------|-----------------|
| C | -1.179783068431 | -0.671729875639 | 0.048296228475  |
| C | 0.000002417017  | -1.641863564904 | -0.000047973992 |
| C | 2.519650747504  | -0.958572348450 | -0.094846451858 |
| C | 3.491670992926  | 0.093844106803  | -0.121178667798 |
| C | 2.999067731223  | 1.439878301270  | -0.102582703456 |
| C | 1.654203166804  | 1.737093929829  | -0.061436342465 |
| C | -1.654180300844 | 1.737098877848  | 0.061546853461  |
| C | -2.999045428254 | 1.439888502272  | 0.102677521436  |
| C | -3.491656693922 | 0.093855984821  | 0.121192011796  |
| C | -2.519641525532 | -0.958564133450 | 0.094792601881  |
| C | 0.049380638603  | -2.524232634853 | 1.264877340602  |
| C | -0.049380542557 | -2.524158148816 | -1.265024556654 |
| C | 9.586797251396  | 0.482228757930  | 0.240347508393  |
| C | 9.136772780790  | -0.778702306416 | -0.224275767260 |
| C | 7.689738123000  | -0.763067630289 | -0.275572518951 |
| C | 7.227575654538  | 0.508005580810  | 0.154069369136  |
| C | 8.406405888901  | 1.407219532923  | 0.523241368895  |
| C | 10.942187362597 | 0.736583086338  | 0.383191991737  |
| C | 11.863939819317 | -0.271806293666 | 0.062643408523  |
| C | 11.421091062271 | -1.520700344160 | -0.396517015710 |
| C | 10.060517883705 | -1.785929545340 | -0.544035982419 |
| C | 6.757760118494  | -1.744705674382 | -0.655721624505 |
| C | 5.406038865551  | -1.456123621483 | -0.599015495390 |
| C | 4.913403965875  | -0.184818027381 | -0.169344831279 |
| C | 5.883437141149  | 0.795907865632  | 0.207573639020  |
| C | 8.453399376284  | 2.664097841976  | -0.371515257896 |
| C | 8.359230605480  | 1.814405854406  | 2.011340148663  |
| C | -7.227560295538 | 0.508055643783  | -0.154011178160 |
| C | -7.689728478004 | -0.763043148274 | 0.275549412956  |
| C | -9.136761822800 | -0.778666726390 | 0.224258453269  |
| C | -9.586783071404 | 0.482296162940  | -0.240279474402 |
| C | -8.406388203904 | 1.407300290927  | -0.523116346907 |
| C | -5.883421786172 | 0.795954352637  | -0.207503416035 |
| C | -4.913390997910 | -0.184801573408 | 0.169346067279  |

|   |                  |                 |                 |
|---|------------------|-----------------|-----------------|
| C | -5.406031452572  | -1.456132818478 | 0.598936331373  |
| C | -6.757752302493  | -1.744711526394 | 0.655630302482  |
| C | -10.060511849708 | -1.785912003379 | 0.543957165384  |
| C | -11.421083699246 | -1.520665575151 | 0.396460760728  |
| C | -11.863928563347 | -0.271740208688 | -0.062615958512 |
| C | -10.942172473560 | 0.736666739365  | -0.383102253753 |
| C | -8.359218303485  | 1.814590035447  | -2.011186993654 |
| C | -8.453371905317  | 2.664117254950  | 0.371727324938  |
| H | 2.845179796063   | -1.993432652388 | -0.069642055036 |
| H | 3.707306944521   | 2.258491011604  | -0.165868672016 |
| H | 1.321302159726   | 2.771067168705  | -0.067045470860 |
| H | -1.321273191717  | 2.771070495695  | 0.067218405879  |
| H | -3.707280319550  | 2.258501693576  | 0.166015305021  |
| H | -2.845177005076  | -1.993421497385 | 0.069525329013  |
| H | 0.935072303752   | -3.168378079513 | 1.250564071608  |
| H | -0.837856288673  | -3.164001991154 | 1.321751998753  |
| H | 0.087287310328   | -1.908645262275 | 2.167953774018  |
| H | -0.087285456303  | -1.908518149244 | -2.168065166041 |
| H | 0.837854064700   | -3.163927762192 | -1.321937402776 |
| H | -0.935074581754  | -3.168300991512 | -1.250747835604 |
| H | 11.289719180739  | 1.703175490390  | 0.738849543499  |
| H | 12.928215181436  | -0.084621936125 | 0.171016783414  |
| H | 12.148635088976  | -2.290066765899 | -0.639691921319 |
| H | 9.721444892132   | -2.754655227510 | -0.900139805178 |
| H | 7.092186640709   | -2.718526356915 | -1.002554049608 |
| H | 4.701471595562   | -2.209857990068 | -0.932988991555 |
| H | 5.559663931701   | 1.762782415669  | 0.578462730897  |
| H | 9.340089115551   | 3.265261019530  | -0.143742527404 |
| H | 7.567626649171   | 3.286654203063  | -0.206382565968 |
| H | 8.487348133769   | 2.388377398987  | -1.429258640524 |
| H | 8.322114458788   | 0.931768852491  | 2.655945061365  |
| H | 9.246206943706   | 2.398716112757  | 2.278355825036  |
| H | 7.474389206406   | 2.426718051779  | 2.215353347470  |
| H | -5.559645092726  | 1.762851602684  | -0.578330752874 |

|   |                  |                 |                 |
|---|------------------|-----------------|-----------------|
| H | -4.701466053542  | -2.209892678060 | 0.932856844566  |
| H | -7.092183017697  | -2.718552613897 | 1.002400997631  |
| H | -9.721441368129  | -2.754661673524 | 0.899996110166  |
| H | -12.148630269971 | -2.290044955859 | 0.639588372338  |
| H | -12.928203249441 | -0.084543427124 | -0.170973360399 |
| H | -11.289701013766 | 1.703283511394  | -0.738695066500 |
| H | -7.474374098396  | 2.426911045791  | -2.215161832456 |
| H | -9.246192433719  | 2.398925340763  | -2.278156816025 |
| H | -8.322111515822  | 0.931998343487  | -2.655854102358 |
| H | -8.487316957768  | 2.388325041978  | 1.429451665546  |
| H | -9.340060830551  | 3.265299551519  | 0.143999191441  |
| H | -7.567597544157  | 3.286681703082  | 0.206632727951  |

Table S6. Cartesian coordinates (Å) for ground and excited states of tetrafluorene.

S<sub>0</sub>

|   |                 |                 |                 |
|---|-----------------|-----------------|-----------------|
| C | 5.357668352200  | 0.611980135900  | -0.356912143100 |
| C | 4.948151705700  | -0.656318101800 | -0.814574945300 |
| C | 3.487635615400  | -0.666032836500 | -0.913334248400 |
| C | 3.003521772800  | 0.596296421700  | -0.515970655600 |
| C | 4.153058001800  | 1.518316672200  | -0.118090144700 |
| C | 6.700704233000  | 0.895955454200  | -0.168553273800 |
| C | 7.673933904600  | -0.087916247400 | -0.438032143700 |
| C | 7.248558212200  | -1.350869631600 | -0.896076051600 |
| C | 5.898510659900  | -1.642614920700 | -1.084596352700 |
| C | 2.595340303200  | -1.664513582300 | -1.308028146200 |
| C | 1.228475770800  | -1.390844694800 | -1.303218972000 |
| C | 0.728619353900  | -0.134004781000 | -0.907534082700 |
| C | 1.643742075000  | 0.862347610000  | -0.510261719300 |
| C | 4.049806295400  | 1.934626275100  | 1.364576378500  |
| C | 4.205698086700  | 2.770207968000  | -1.019047306400 |
| C | -3.003519591000 | -0.596215329800 | -0.515988517300 |
| C | -3.487643910100 | 0.666140751000  | -0.913243789600 |
| C | -4.948162127900 | 0.656399166600  | -0.814502763400 |
| C | -5.357669149900 | -0.611947238300 | -0.356968728800 |

|   |                  |                 |                 |
|---|------------------|-----------------|-----------------|
| C | -4.153043892200  | -1.518256110800 | -0.118114137300 |
| C | -1.643737776800  | -0.862258953900 | -0.510316092300 |
| C | -0.728626440000  | 0.134131660000  | -0.907511558300 |
| C | -1.228493463100  | 1.391006797900  | -1.303078373400 |
| C | -2.595359101600  | 1.664666032000  | -1.307851855700 |
| C | -5.898527735100  | 1.642709893500  | -1.084450386100 |
| C | -7.248574501100  | 1.350924544000  | -0.895991112600 |
| C | -7.673943062100  | 0.087917670400  | -0.438086983300 |
| C | -6.700705965200  | -0.895967466400 | -0.168682804900 |
| C | -4.205629869200  | -2.770230430300 | -1.018945876600 |
| C | -4.049804480100  | -1.934402186200 | 1.364613511300  |
| C | -11.324713663800 | 0.499422909700  | 0.455659749400  |
| C | -11.841600165500 | -0.767685863100 | 0.122238547500  |
| C | -13.277414463000 | -0.778435782900 | 0.417030067400  |
| C | -13.635232967100 | 0.482726337100  | 0.934933269500  |
| C | -12.421628565700 | 1.405190895800  | 1.008133166000  |
| C | -9.979928372800  | 0.783705558400  | 0.278756432900  |
| C | -9.114367724600  | -0.199505699500 | -0.242270140000 |
| C | -9.646854221700  | -1.461882196200 | -0.571853696100 |
| C | -10.998465570700 | -1.753259828500 | -0.393290013100 |
| C | -14.236004031100 | -1.781915879400 | 0.263983193700  |
| C | -15.556498460700 | -1.512839410600 | 0.632889454800  |
| C | -15.912341201100 | -0.260483467500 | 1.146859577600  |
| C | -14.949614373500 | 0.745230393400  | 1.300351896500  |
| C | -12.122731861700 | 1.823788088700  | 2.463355907400  |
| C | -12.612140632900 | 2.656119673500  | 0.124465154900  |
| C | 11.324706296100  | -0.499491112200 | 0.455698077800  |
| C | 11.841594665300  | 0.767633223900  | 0.122339383500  |
| C | 13.277422431100  | 0.778342881600  | 0.417060144700  |
| C | 13.635250002900  | -0.482860155900 | 0.934858469200  |
| C | 12.421616435800  | -1.405281439300 | 1.008151838900  |
| C | 9.979919766100   | -0.783763173000 | 0.278780531600  |
| C | 9.114357483200   | 0.199482661100  | -0.242174826000 |
| C | 9.646838687800   | 1.461886879700  | -0.571660685900 |

|   |                  |                 |                 |
|---|------------------|-----------------|-----------------|
| C | 10.998453045300  | 1.753249341300  | -0.393097392500 |
| C | 14.236019254400  | 1.781816106700  | 0.264014466600  |
| C | 15.556538383100  | 1.512684349200  | 0.632793207400  |
| C | 15.912396209700  | 0.260278920200  | 1.146631992300  |
| C | 14.949658318800  | -0.745422602000 | 1.300137658800  |
| C | 12.122755864300  | -1.823713411000 | 2.463451807000  |
| C | 12.612023994300  | -2.656302351200 | 0.124608507600  |
| H | 7.008997516200   | 1.865739427700  | 0.212346267100  |
| H | 7.994595198900   | -2.103447529400 | -1.132765131700 |
| H | 5.596466968800   | -2.621364465800 | -1.447009691100 |
| H | 2.956378357300   | -2.638779141600 | -1.625760474100 |
| H | 0.531045542300   | -2.152916192300 | -1.637668202600 |
| H | 1.274293742000   | 1.827454272400  | -0.174548240000 |
| H | 4.914622920500   | 2.540460692900  | 1.654776800600  |
| H | 3.145398130100   | 2.528197826100  | 1.534816520200  |
| H | 4.011808300100   | 1.056126951900  | 2.014712318300  |
| H | 3.304065224100   | 3.377318306600  | -0.885829025400 |
| H | 5.073235764500   | 3.389029493900  | -0.766345351900 |
| H | 4.278740327400   | 2.489364320600  | -2.073475400500 |
| H | -1.274280876500  | -1.827393622300 | -0.174692959900 |
| H | -0.531070600400  | 2.153111362600  | -1.637467885700 |
| H | -2.956410210000  | 2.638954769600  | -1.625496609600 |
| H | -5.596490390300  | 2.621498219900  | -1.446760982200 |
| H | -7.994616397200  | 2.103514377700  | -1.132623235800 |
| H | -7.008992686700  | -1.865796331000 | 0.212104644500  |
| H | -3.304002593300  | -3.377327885900 | -0.885627765500 |
| H | -5.073170942500  | -3.389040355300 | -0.766226955900 |
| H | -4.278624296400  | -2.489501615300 | -2.073407567800 |
| H | -4.914592625500  | -2.540250666600 | 1.654862294300  |
| H | -3.145358798200  | -2.527886714700 | 1.534945125200  |
| H | -4.011881077500  | -1.055818257100 | 2.014638279200  |
| H | -9.580993246100  | 1.753145660900  | 0.564843493700  |
| H | -8.991506400600  | -2.214186476300 | -1.000264270100 |
| H | -11.386693417000 | -2.731564021900 | -0.663073659100 |

|   |                  |                 |                 |
|---|------------------|-----------------|-----------------|
| H | -13.961813640100 | -2.754747167800 | -0.134870457100 |
| H | -16.314655781500 | -2.282529070200 | 0.519879147700  |
| H | -16.943389894800 | -0.067702508600 | 1.428932634900  |
| H | -15.230359103000 | 1.716272693400  | 1.700385394700  |
| H | -11.211698679700 | 2.429619766900  | 2.509916564200  |
| H | -12.948124006100 | 2.418000751500  | 2.869388979000  |
| H | -11.984623717900 | 0.946232128400  | 3.101102064800  |
| H | -13.444815319000 | 3.264458606200  | 0.492950651900  |
| H | -11.708529840700 | 3.274822177300  | 0.134745081000  |
| H | -12.824180785900 | 2.374242539300  | -0.910696347500 |
| H | 9.580991028700   | -1.753225989500 | 0.564800041600  |
| H | 8.991483189900   | 2.214223307300  | -1.000006560700 |
| H | 11.386675356600  | 2.731574204500  | -0.662818278900 |
| H | 13.961818491600  | 2.754683728900  | -0.134744550200 |
| H | 16.314703934900  | 2.282366112600  | 0.519777984900  |
| H | 16.943465477700  | 0.067449968800  | 1.428597369700  |
| H | 15.230415173200  | -1.716501915100 | 1.700071164000  |
| H | 12.948050871100  | -2.418072131700 | 2.869460992400  |
| H | 11.984899436100  | -0.946076225200 | 3.101137376100  |
| H | 11.211592719700  | -2.429333638300 | 2.510143045600  |
| H | 11.708383124800  | -3.274961276700 | 0.134985958000  |
| H | 12.824041244400  | -2.374550918200 | -0.910592609400 |
| H | 13.444679446700  | -3.264653939900 | 0.493121545100  |

S<sub>1</sub>

|   |                 |                 |                 |
|---|-----------------|-----------------|-----------------|
| C | -5.373722128221 | -0.641951293485 | -0.254573494415 |
| C | -4.925320987779 | 0.687987012857  | -0.502287565360 |
| C | -3.495696075211 | 0.695662542371  | -0.553999933126 |
| C | -3.014614877358 | -0.630364658686 | -0.339479556601 |
| C | -4.183438810007 | -1.588230421045 | -0.115945653404 |
| C | -6.714495309366 | -0.932044263531 | -0.155318675233 |
| C | -7.687223934791 | 0.098282147106  | -0.294224480301 |
| C | -7.221097145021 | 1.421166368950  | -0.538602513990 |
| C | -5.875466238600 | 1.721807278709  | -0.645310342753 |

|   |                 |                 |                 |
|---|-----------------|-----------------|-----------------|
| C | -2.567477489977 | 1.739793673035  | -0.765181951425 |
| C | -1.217703796216 | 1.457320609572  | -0.754495708646 |
| C | -0.710128903455 | 0.133387865661  | -0.545344035500 |
| C | -1.671588344073 | -0.908750949809 | -0.338094589513 |
| C | -4.130275585176 | -2.217337281608 | 1.292284144611  |
| C | -4.217169169480 | -2.693723972134 | -1.191770559336 |
| C | 3.014614901383  | 0.630365819648  | -0.339477661564 |
| C | 3.495695332193  | -0.695661901379 | -0.553997783132 |
| C | 4.925320543747  | -0.687986927818 | -0.502285215389 |
| C | 5.373722063238  | 0.641951267502  | -0.254571137460 |
| C | 4.183438904042  | 1.588230561065  | -0.115941531378 |
| C | 1.671588593104  | 0.908752557820  | -0.338093671496 |
| C | 0.710128514457  | -0.133385755672 | -0.545343616497 |
| C | 1.217703202214  | -1.457318912554 | -0.754494723636 |
| C | 2.567476932965  | -1.739792422007 | -0.765179932402 |
| C | 5.875465354556  | -1.721807322736 | -0.645308104757 |
| C | 7.221096799045  | -1.421166793933 | -0.538600665997 |
| C | 7.687223783816  | -0.098282663107 | -0.294223263299 |
| C | 6.714495474363  | 0.932043887497  | -0.155317145276 |
| C | 4.217169737446  | 2.693727596099  | -1.191762774345 |
| C | 4.130275792190  | 2.217332481600  | 1.292290305610  |
| C | 11.385693586709 | -0.510757268003 | 0.323612682419  |
| C | 11.874536605106 | 0.774269962070  | -0.005581138410 |
| C | 13.318397427675 | 0.789316313166  | 0.185347520443  |
| C | 13.724544843088 | -0.486104810196 | 0.638721061252  |
| C | 12.526268817312 | -1.421873222012 | 0.770943010841  |
| C | 10.039944894216 | -0.803127053167 | 0.233728771933  |
| C | 9.116789143359  | 0.189270622705  | -0.192007352914 |
| C | 9.629653362488  | 1.473602416716  | -0.515921520365 |
| C | 10.983219982548 | 1.768670306119  | -0.428877078052 |
| C | 14.259795002906 | 1.807525429900  | -0.004977193337 |
| C | 15.603462186216 | 1.538713882475  | 0.260056113833  |
| C | 16.005158410318 | 0.273922690818  | 0.709033888351  |
| C | 15.062443646026 | -0.745961661013 | 0.900465935212  |

|   |                  |                 |                 |
|---|------------------|-----------------|-----------------|
| C | 12.334968782447  | -1.883818140469 | 2.231123849586  |
| C | 12.663084066222  | -2.645437714628 | -0.159599965563 |
| C | -11.385693303705 | 0.510757196987  | 0.323613612448  |
| C | -11.874536665114 | -0.774270385094 | -0.005579861400 |
| C | -13.318397307710 | -0.789316662159 | 0.185349392408  |
| C | -13.724544741115 | 0.486104822208  | 0.638722749274  |
| C | -12.526268197328 | 1.421872914983  | 0.770944960859  |
| C | -10.039944967242 | 0.803126682161  | 0.233728770927  |
| C | -9.116789418373  | -0.189271256712 | -0.192007660895 |
| C | -9.629653578498  | -1.473603104752 | -0.515921048391 |
| C | -10.983220126537 | -1.768670942137 | -0.428876019062 |
| C | -14.259795130861 | -1.807525829905 | -0.004974650376 |
| C | -15.603462221194 | -1.538713644451 | 0.260058737812  |
| C | -16.005158204309 | -0.273922429828 | 0.709036025380  |
| C | -15.062443319999 | 0.745961937032  | 0.900467623234  |
| C | -12.334967710440 | 1.883815195438  | 2.231126715609  |
| C | -12.663083682251 | 2.645438727632  | -0.159595569581 |
| H | -7.032393000370  | -1.945195075908 | 0.071421134183  |
| H | -7.947354581652  | 2.213577193350  | -0.687098071756 |
| H | -5.556426776454  | 2.739705467454  | -0.850377406572 |
| H | -2.911888390940  | 2.753997334457  | -0.946616243578 |
| H | -0.519165001608  | 2.261793403823  | -0.956219422245 |
| H | -1.336090388797  | -1.920188418073 | -0.133383259649 |
| H | -5.009271029827  | -2.847287373259 | 1.465212477118  |
| H | -3.235998083404  | -2.840115436702 | 1.401116577484  |
| H | -4.105258065342  | -1.443179211527 | 2.064189985519  |
| H | -3.323692230757  | -3.323506105731 | -1.123487814388 |
| H | -5.096602241176  | -3.332775870398 | -1.058668400705 |
| H | -4.255824816246  | -2.260821871753 | -2.195278353990 |
| H | 1.336090496802   | 1.920190275061  | -0.133382346659 |
| H | 0.519164175616   | -2.261791360828 | -0.956218487242 |
| H | 2.911887278927   | -2.753996387494 | -0.946613375543 |
| H | 5.556425769482   | -2.739705509471 | -0.850375329605 |
| H | 7.947353567643   | -2.213578011353 | -0.687096182752 |

|   |                  |                 |                 |
|---|------------------|-----------------|-----------------|
| H | 7.032393352379   | 1.945194857887  | 0.071422274190  |
| H | 3.323693125755   | 3.323509394726  | -1.123477957403 |
| H | 5.096602994142   | 3.332778896392  | -1.058658317656 |
| H | 4.255825633243   | 2.260828896740  | -2.195272201035 |
| H | 5.009271656849   | 2.847281660261  | 1.465221172135  |
| H | 3.235998425411   | 2.840110596741  | 1.401124626481  |
| H | 4.105257841341   | 1.443171783519  | 2.064193325527  |
| H | 9.679805914113   | -1.784349783238 | 0.527999198260  |
| H | 8.949750116269   | 2.236167490969  | -0.881336644818 |
| H | 11.343860701689  | 2.757403755726  | -0.698855391619 |
| H | 13.951112569514  | 2.789326168057  | -0.353101894578 |
| H | 16.346623604055  | 2.318021006894  | 0.116953644463  |
| H | 17.055163232335  | 0.082740801018  | 0.910374752952  |
| H | 15.378769151952  | -1.725662840014 | 1.249359356472  |
| H | 11.434399007207  | -2.499820510090 | 2.324668527369  |
| H | 13.191977518522  | -2.480658503683 | 2.560679857474  |
| H | 12.235193219249  | -1.025842881305 | 2.901759369158  |
| H | 13.524142552603  | -3.256252243865 | 0.131725435542  |
| H | 11.766765366296  | -3.272266178998 | -0.103908056505 |
| H | 12.799298571106  | -2.332550040980 | -1.198561676819 |
| H | -9.679805618145  | 1.784349518226  | 0.527998517261  |
| H | -8.949750319261  | -2.236168088993 | -0.881335975832 |
| H | -11.343861386656 | -2.757404069739 | -0.698853657611 |
| H | -13.951112842516 | -2.789326553033 | -0.353098911553 |
| H | -16.346623816043 | -2.318020578896 | 0.116956645480  |
| H | -17.055163026380 | -0.082740555004 | 0.910376774939  |
| H | -15.378768380941 | 1.725663583985  | 1.249360443508  |
| H | -13.191976240559 | 2.480655334706  | 2.560683874459  |
| H | -12.235192344255 | 1.025838778329  | 2.901760670193  |
| H | -11.434397766233 | 2.499816942060  | 2.324671845363  |
| H | -11.766764602323 | 3.272266981019  | -0.103902961533 |
| H | -12.799298491094 | 2.332552932933  | -1.198557985808 |
| H | -13.524141720578 | 3.256253302854  | 0.131730854528  |
